# Supplementary material
Source: publisher figshare collection journal article supplement (https://gsajournals.figshare.com/ndownloader/files/16464719)
Supplement: Supplementary file 1 [file 16464719]

| ♂ \ ♀       | uwa02 | uwa06 | uwa05 | uwa13 | uwa15 | uwa14 | hif-1(ia04) |
|-------------|-------|-------|-------|-------|-------|-------|-------------|
| uwa02       | +     | +     | -     | -     | -     | -     | -           |
| uwa06       | +     | +     | +     | +     | +     | +     | +           |
| uwa05       | -     | +     | +     | +     | +     | -     | -           |
| uwa13       | -     | +     | +     | +     | +     | -     | -           |
| uwa15       | -     | +     | +     | +     | +     | -     | -           |
| uwa14       | -     | +     | -     | -     | -     | +     | -           |
| hif-1(ia04) | -     | +     | -     | -     | -     | -     | -           |

**Figure S1. Complementation analysis of *suH* alleles.** Progeny of matings between males (left column) and hermaphrodites (top) were exposed to H<sub>2</sub>S. If a majority of heterozygous animals survived H<sub>2</sub>S, indicating non-complementation, cells are marked with +. Complementing crosses are indicated with -. The two independent complementation groups are colored in cyan and magenta. The *uwa06* allele is dominant, but is included in the yellow group because it is also a gain-of-function allele of *skn-1*.

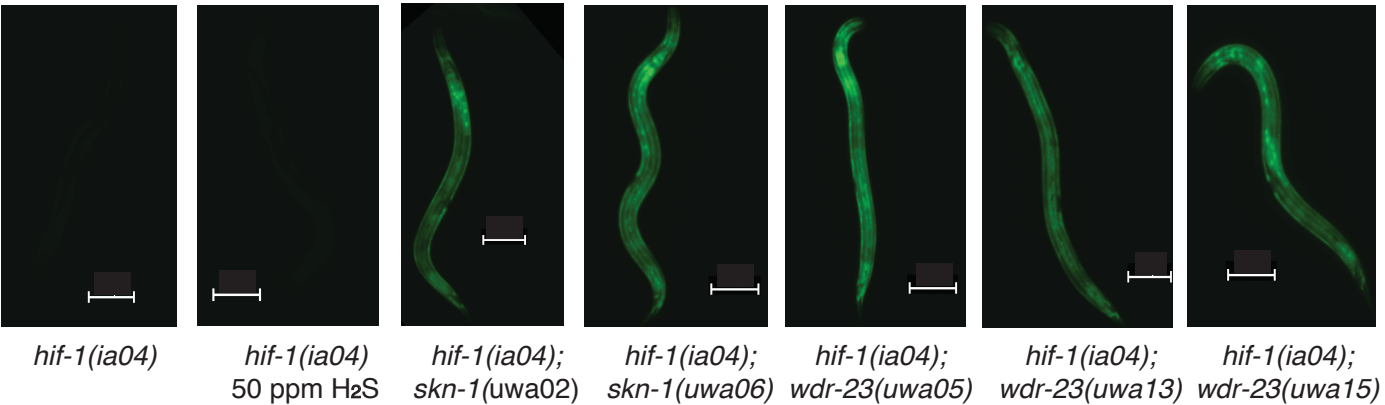

**Figure S2. *suH* mutations increase SKN-1 activity.** Representative images of animals with the *Pgst-4::gfp* transgene. There was no expression of GFP in *hif-1(ia04)* animals, even after exposure to 50 ppm H<sub>2</sub>S. All other animals were in room air without H<sub>2</sub>S. Scale bar is 100 μM.

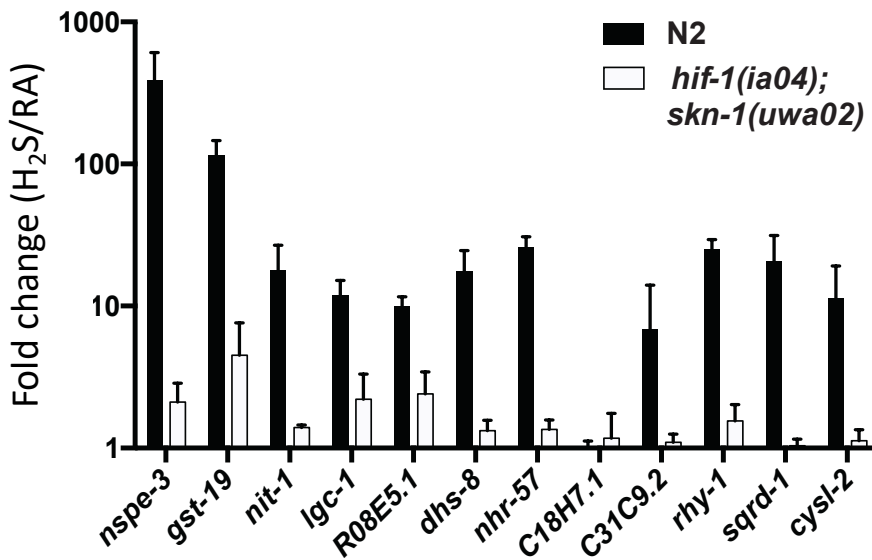

**Figure S3. H<sub>2</sub>S-induced gene expression is not restored in *skn-1(uwa02gf)* mutant animals.** Change in transcript abundance of H<sub>2</sub>S-inducible gene products measured by qRT-PCR after exposure to 50 ppm H<sub>2</sub>S for 1 h. Average fold change calculated from  $\Delta\Delta C_t$  ( $\Delta C_t^{H_2S} - \Delta C_t^{RA}$ ), error bars show standard deviation. RA is room air without H<sub>2</sub>S. N=3 independent experiments, each with three technical replicates.

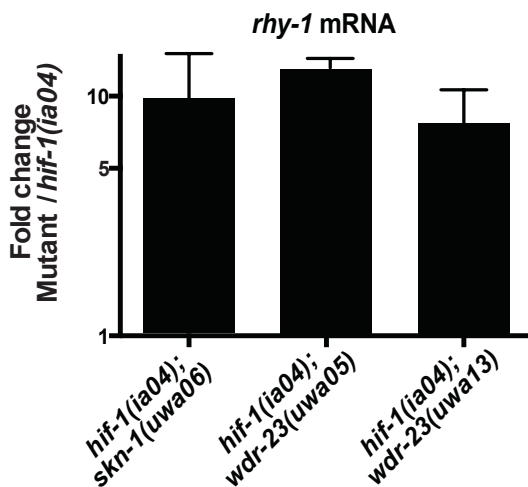

**Figure S4. *rhy-1* expression is increased in *suH* mutants.** *rhy-1* mRNA abundance in *suH* mutant animals, as measured by qRT-PCR. Average fold change in *rhy-1* expression between the indicated *Suh* strain compared to *hif-1(ia04)*. Bars indicated one standard deviation.
